# Supplementary material for: Sensitive fluorescent detection of fibrin based on the inner filter effect of gold nanoparticles
Source: Royal Society of Chemistry journal article supplement (doi:10.1039/c7ra02422c), 2017-01-01
Supplement: c7ra02422c1.pdf [file c7ra02422c1.pdf]

## Sensitive fluorescent detection of Fibrin based on the inner filter effect of gold Nanoparticles

Ting Liu, Yuanfu Zhang\*, Tingting Hou, Qingwang Xue, Lei Wang, Shuhao Wang \*

Shandong Provincial Key Laboratory of Chemical Energy Storage and Novel Cell Technology,  
School of Chemistry and Chemical Engineering, Liaocheng University, Liaocheng 252000, China

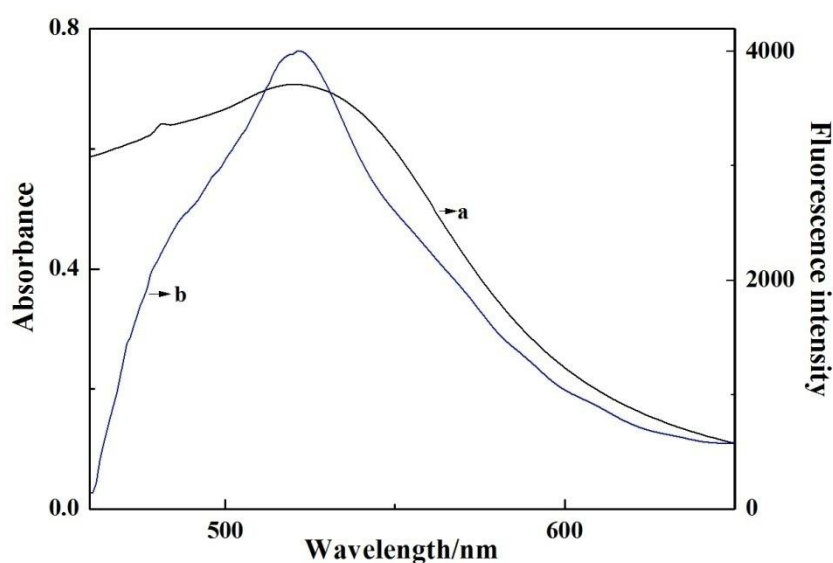

**Fig. S1** Absorption spectrum (a) of AuNPs and fluorescence emission spectra (b) of FAM. Experimental conditions: AuNPs, 11.3 nM; FAM, 1  $\mu$ M, ex = 485 nm.

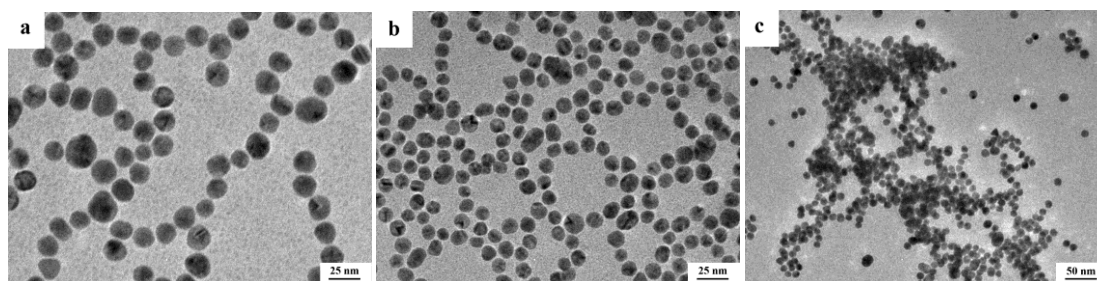

**Fig. S2** TEM images of AuNPs (a), AuNPs+Fib (b), and AuNPs+Fibrin (c)

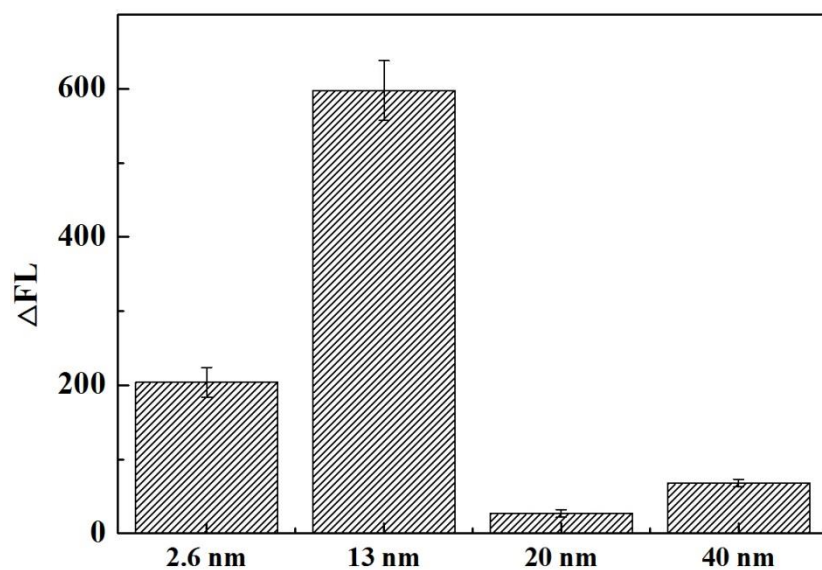

**Fig. S3** The effect of AuNPs with different size on the IFE-based fluorescence assay. Experimental conditions: FAM 1  $\mu$ M, Fib 3 nM ; Fibrin 3 nM

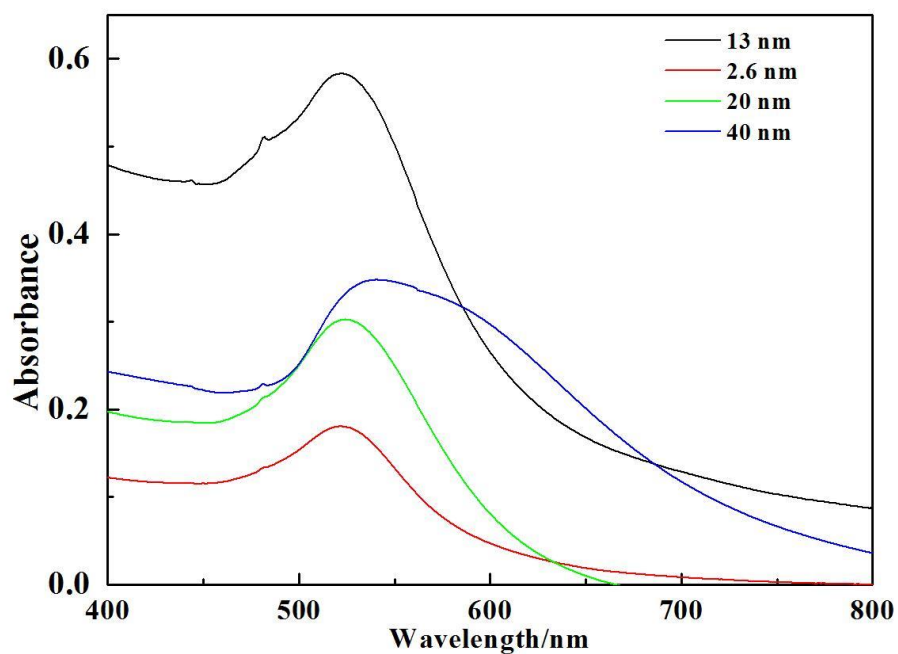

**Fig. S4** Absorption spectrum (a) of AuNPs with different diameter.

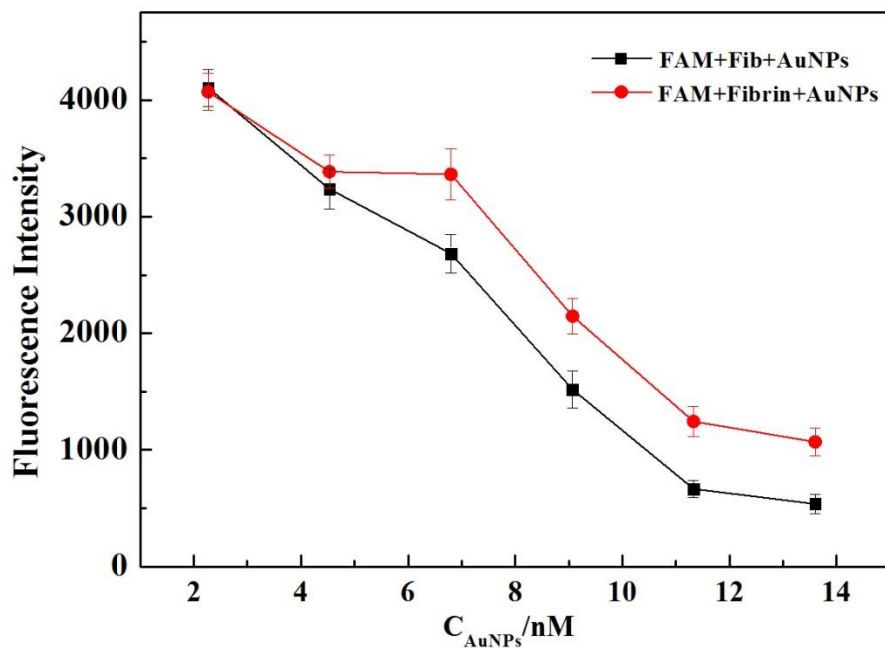

**Fig. S5** The effect of AuNPs concentration on the IFE-based fluorescence assay. Experimental conditions: FAM 1  $\mu\text{M}$ , Fib 3 nM, Fibrin 3 nM

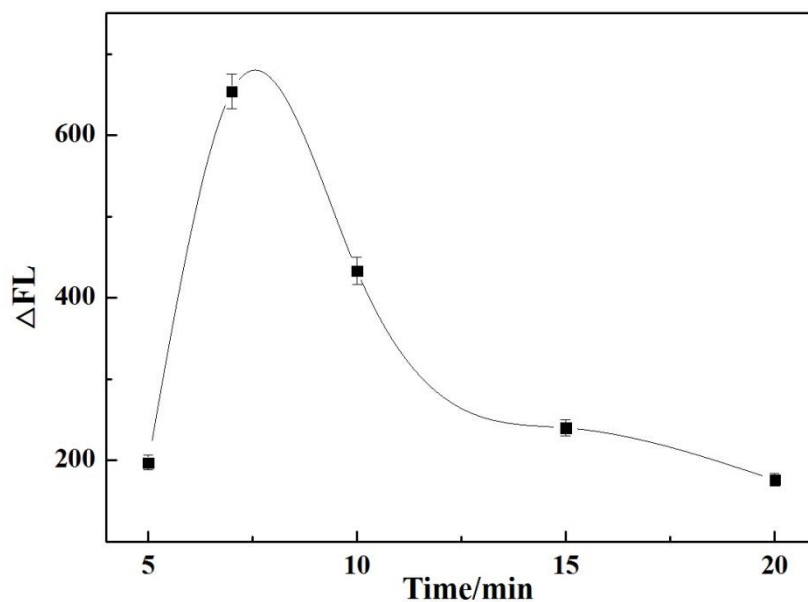

**Fig. S6** The effect of incubation time of AuNPs–fibrin on the IFE-based fluorescence assay. Experimental conditions: FAM 1  $\mu\text{M}$ , Fib 3 nM; Fibrin 3 nM

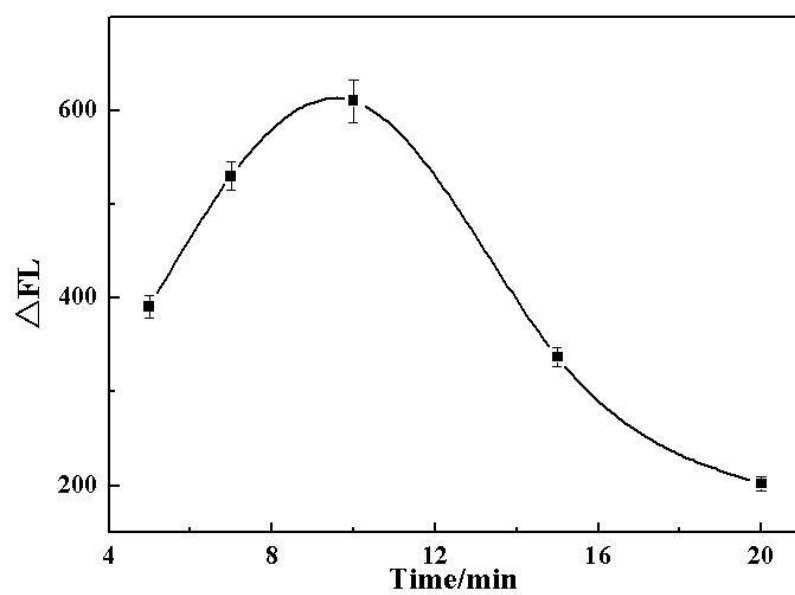

**Fig. S7** The effect of incubation time of AuNPs–FAM on the IFE-based fluorescence assay. Experimental conditions: FAM 1  $\mu$ M, Fib 3 nM; Fibrin 3 nM
